# Supplementary material for: A Combination of Rosa Canina Extracts and Gold Complex Favors Apoptosis of Caco-2 Cells by Increasing Oxidative Stress and Mitochondrial Dysfunction
Source: Antioxidants (Basel). 2019 Dec 24;9(1):17. doi: 10.3390/antiox9010017 (PMC7023183; doi:10.3390/antiox9010017)
Supplement: Supplementary file 1 [file antioxidants-09-00017-s001.pdf]

**A combination of *Rosa canina* extracts and gold complex favors apoptosis of Caco-2 cells by increasing oxidative stress and mitochondrial dysfunction**

Inés Mármol<sup>1</sup>, Nerea Jiménez-Moreno<sup>2</sup>, Carmen Ancín-Azpilicueta<sup>2</sup>, Jesús Osada<sup>3, 4</sup>,  
Elena Cerrada<sup>5\*</sup>, Maria Jesús Rodríguez-Yoldi<sup>1, 4\*</sup>

<sup>1</sup>Dept. of Pharmacology and Physiology, Veterinary Faculty, University of Zaragoza, Zaragoza, Spain.

<sup>2</sup>Dept. of Science, Public University of Navarra, INAMAT, Navarra, Spain.

<sup>3</sup>Dept. of Biochemistry and Molecular Biology, Veterinary Faculty, University of Zaragoza, Zaragoza, Spain.

<sup>4</sup>CIBERobn (ISCIII), IIS Aragón, IA2, Zaragoza, Spain.

<sup>5</sup>Dept. of Inorganic Chemistry, Sciences Faculty, University of Zaragoza, Zaragoza, Spain.

\*Corresponding authors: M. J. Rodríguez-Yoldi,

Physiology, Veterinary Faculty,

Miguel Servet 177, 50013 Zaragoza, Spain

Phone : 34-976 761649. Fax : 34-976 761612

e-mail: [mjrodyol@unizar.es](mailto:mjrodyol@unizar.es).

\*Corresponding authors: E. Cerrada,

Inorganic Chemistry, Instituto de Síntesis Química y Catálisis Homogénea-ISQCH,

Pedro Cerbuna 12, 50009 Zaragoza, Spain

Phone : 34-876 553529

e-mail: [ecerrada@unizar.es](mailto:ecerrada@unizar.es)

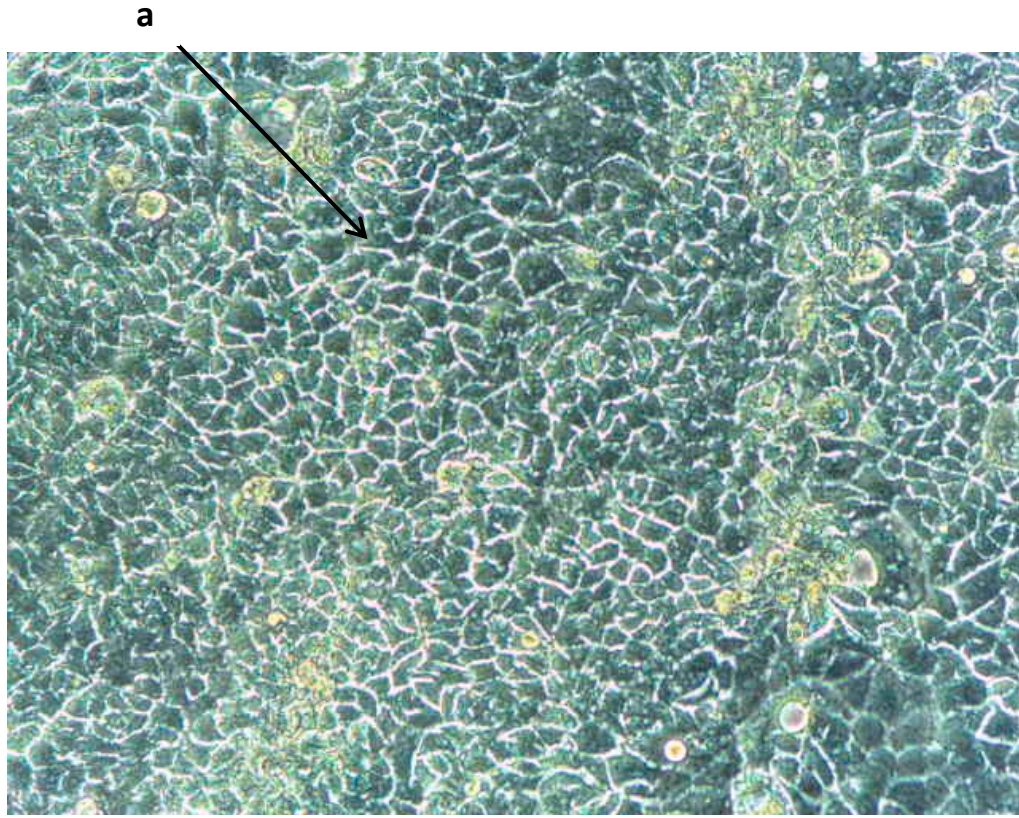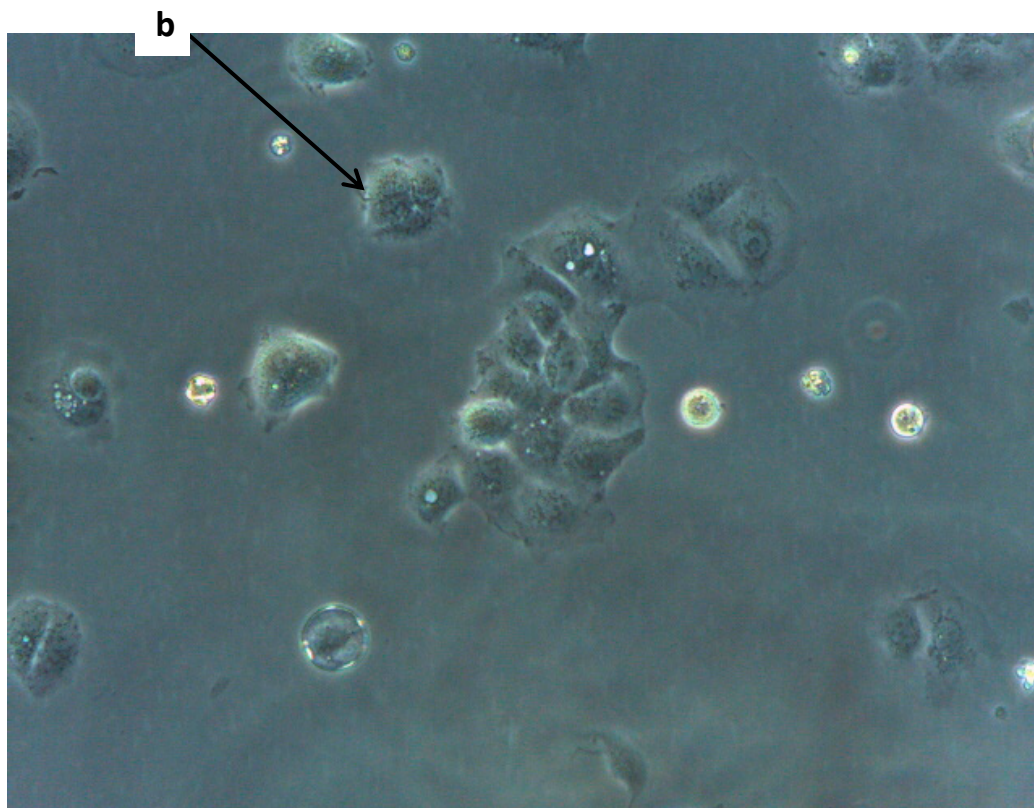

**Figure S1.** Optical phase contrast microscopy at 20X magnification of Caco-2 cells. Up) Differentiated cells at one week post-seeding, (a) definition of cytoplasmic membrane limits and the polygonal shape Down) Undifferentiated cells at 24 h post-seeding., (b)

undefined cytoplasmic membrane and round shape. The low density seed cells shows a bigger size than the differentiated cells

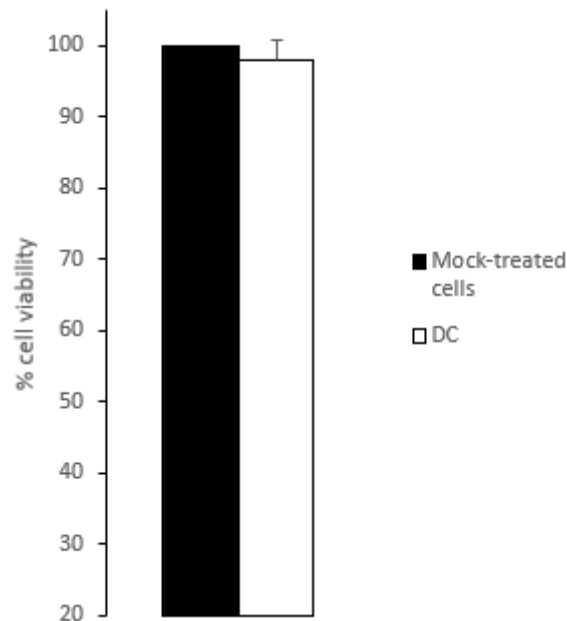

**Figure S2.** Measurement of differentiated Caco-2 cells viability after 72 h incubation with drug combination (DC). No significant changes were observed in comparison to negative control.

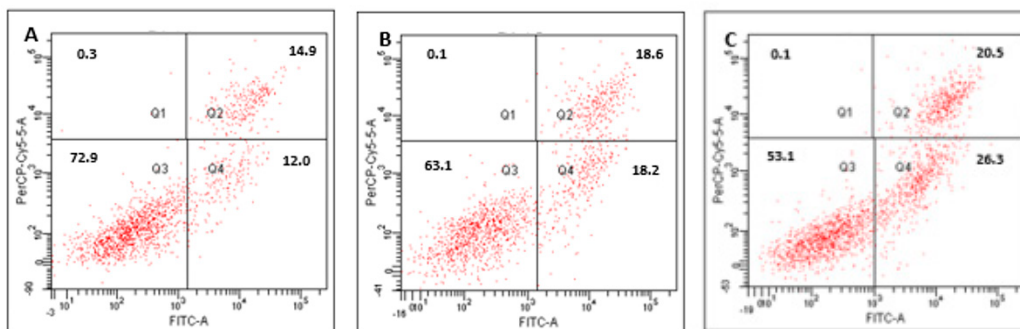

**Figure S3.** Cell death analysis of Caco-2 cells viability after 48h incubation with A) DMSO (negative control), B) gold complex and C) acidic polyphenols. Q1: necrotic cells; Q2: late apoptotic cells; Q3: alive cells; Q4: early apoptotic cells. Percentages of cell population on each condition are included.

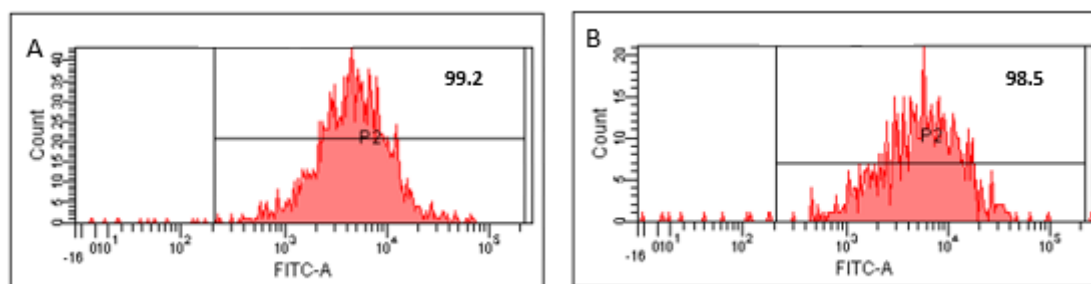

**Figure S4.** Flow cytometry analysis of the expression levels of RIP-1 on Caco-2 cells after 48h incubation with **A)** DMSO (negative control) or **B)** Drug combination (DC). Percentages of cell population with non-active RIP-1 (P2) are included.

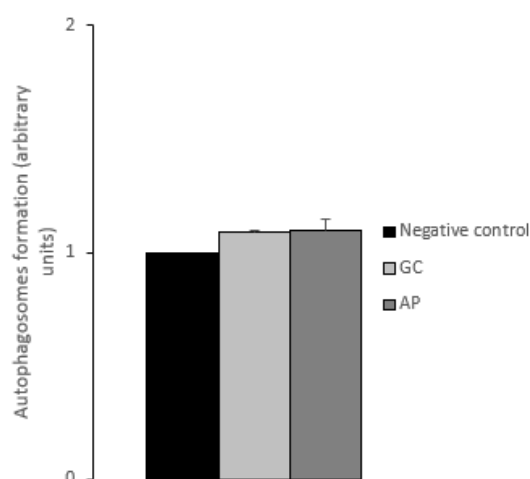

**Figure S5.** Measurement of changes in the formation of autophagosomes on Caco-2 cells after 24 h incubation with the gold complex (GC) and acidic polyphenols (AP). No significant changes were observed in comparison to negative control.
